# Supplementary material for: p140Cap inhibits β-Catenin in the breast cancer stem cell compartment instructing a protective anti-tumor immune response
Source: PubMed Central journal article supplement (PMC10175288; doi:10.1038/s41467-023-37824-y), 2023-05-11
Supplement: 41467_2023_37824_MOESM1_ESM.pdf [file 41467_2023_37824_MOESM1_ESM.pdf]

1 **Supplementary Information**

2 **p140Cap inhibits  $\beta$ -Catenin in the breast cancer stem cell compartment instructing a protective**  
3 **anti-tumor immune response**

4 Vincenzo Salemme<sup>1,2</sup>, Mauro Vedelago<sup>1</sup>, Alessandro Sarcinella<sup>1</sup>, Federico Moietta<sup>1</sup>, Alessio  
5 Piccolantonio<sup>1,2</sup>, Enrico Moiso<sup>1</sup>, Giorgia Centonze<sup>1,2</sup>, Marta Manco<sup>1</sup>, Andrea Guala<sup>1</sup>, Alessia  
6 Lamolinara<sup>3</sup>, Costanza Angelini<sup>1</sup>, Alessandro Morellato<sup>1,2</sup>, Dora Natalini<sup>1</sup>, Raffaele Calogero<sup>1,2</sup>,  
7 Danny Incarnato<sup>4</sup>, Salvatore Oliviero<sup>2,5</sup>, Laura Conti<sup>1,2</sup>, Manuela Iezzi<sup>3</sup>, Daniela Tosoni<sup>6</sup>, Giovanni  
8 Bertalot<sup>6</sup>, Stefano Freddi<sup>6</sup>, Francesco A. Tucci<sup>6,7</sup>, Francesco De Santis<sup>8</sup>, Cristina Frusteri<sup>8</sup>, Stefano  
9 Ugel<sup>8</sup>, Vincenzo Bronte<sup>8</sup>, Federica Cavallo<sup>1,2</sup>, Paolo Provero<sup>9</sup>, Marta Gai<sup>1</sup>, Daniela Taverna<sup>1,2</sup>, Emilia  
10 Turco<sup>1</sup>, Salvatore Pece<sup>6,10\*</sup> and Paola Defilippi<sup>1,2\*\*</sup>.

11 <sup>1</sup>Department of Molecular Biotechnology and Health Sciences, University of Torino, Via Nizza 52,  
12 10126, Torino, Italy.

13 <sup>2</sup>Molecular Biotechnology Center (MBC) "Guido Tarone", Via Nizza, 52, 10126, Turin, Italy

14 <sup>3</sup>Immuno-Oncology Laboratory, Center for Advanced Studies and Technologies; Department of  
15 Neurosciences, Imaging and Clinical Sciences. G. d'Annunzio University of Chieti-Pescara, Italy

16 <sup>4</sup>Department of Molecular Genetics, Groningen Biomolecular Sciences and Biotechnology Institute  
17 (GBB), University of Groningen, Groningen, the Netherlands.

18 <sup>5</sup>Department of Life Sciences and Systems Biology, University of Turin, Torino, Italy.

19 <sup>6</sup>European Institute of Oncology IRCCS, 20141 Milan, Italy

20 <sup>7</sup>School of Pathology, University of Milan, Milan, Italy.

21 <sup>8</sup>Immunology Section, Department of Medicine, University of Verona, 37134 Verona, Italy

22 <sup>9</sup>Neuroscience Department "Rita Levi Montalcini", University of Torino, Via Cherasco 15, 10126  
23 Torino, Italy.

24 <sup>10</sup>Department of Oncology and Hemato-Oncology, Università degli Studi di Milano, 20142 Milano,  
25 Italy.

26 \*\*Corresponding Author: Paola Defilippi ([paola.defilippi@unito.it](mailto:paola.defilippi@unito.it))

27 \*Co-corresponding Author: Salvatore Pece ([salvatore.pece@ieo.it](mailto:salvatore.pece@ieo.it))

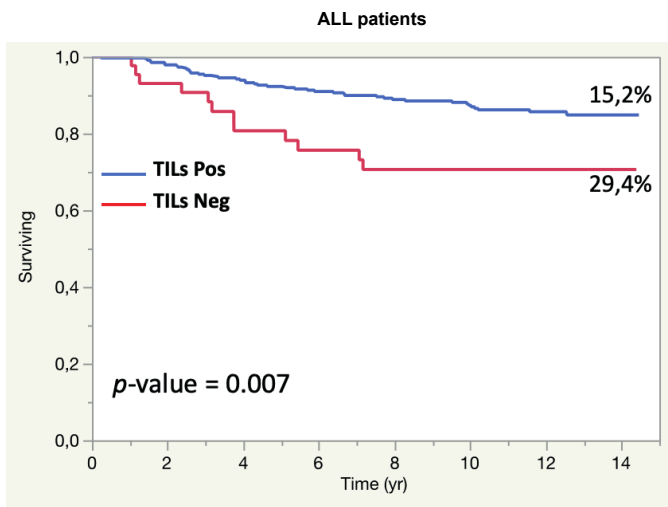

|              | TILs Neg   | TILs Pos    | Total |
|--------------|------------|-------------|-------|
| p140Cap Low  | 15 (36,5%) | 66 (20,4%)  | 81    |
| p140Cap High | 26 (63,4%) | 257 (79,5%) | 283   |
| Total        | 41         | 323         | 364   |

OR = 2,25 (1,13;4,48)  
P = 0,02

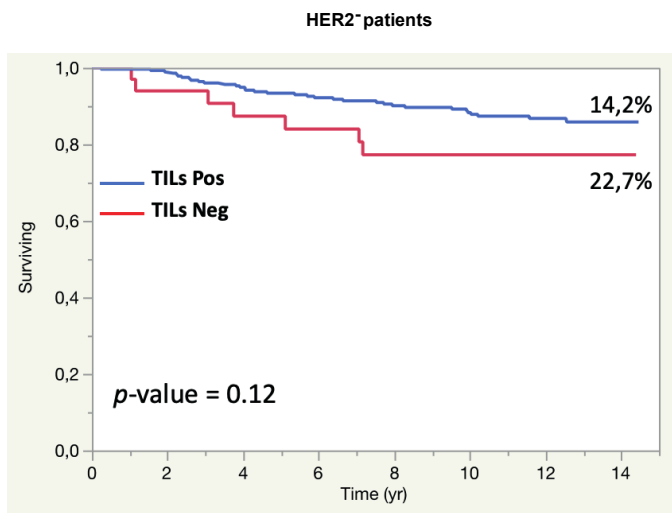

|              | TILs Neg   | TILs Pos    | Total |
|--------------|------------|-------------|-------|
| p140Cap Low  | 11 (29,1%) | 51 (19,0%)  | 62    |
| p140Cap High | 21 (65,6%) | 217 (80,9%) | 238   |
| Total        | 32         | 268         | 300   |

OR = 2,23 (1,01;4,91)  
P = 0,04

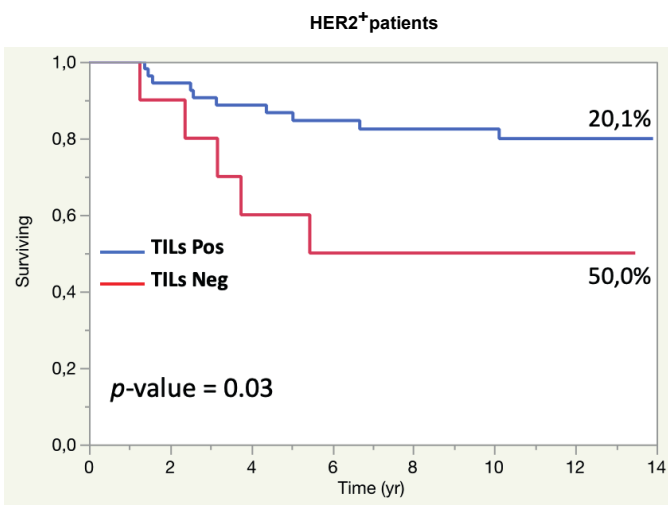

|              | TILs Neg  | TILs Pos   | Total |
|--------------|-----------|------------|-------|
| p140Cap Low  | 4 (44,4%) | 15 (27,2%) | 19    |
| p140Cap High | 5 (55,5%) | 40 (72,7%) | 45    |
| Total        | 9         | 55         | 64    |

OR = 2,13 (0,50;9,03)  
P = 0,30

30 **Supplementary Fig. 1**

31 Left, The overall survival rates of the negative and positive stromal TIL groups were analyzed using  
32 Kaplan-Meier survival analysis, and the statistical significance of between-group differences was  
33 evaluated using the Log-rank Test. Univariate and multivariate Cox regression analyses were  
34 performed to identify the prognostic significance of stromal TILs. Right, Analysis of the distribution  
35 of TIL-positive and TIL-negative female patients according to their p140Cap status (p140Cap<sup>HIGH</sup> vs.  
36 p140Cap<sup>LOW</sup>) in all patients (top) and in the subgroup of HER2-negative (middle) and HER2-positive  
37 (bottom) patients; p-value, Pearson's Chi-Squared Test.

38

39

40

41

42

43

44

45

46

47

48

49

50

51

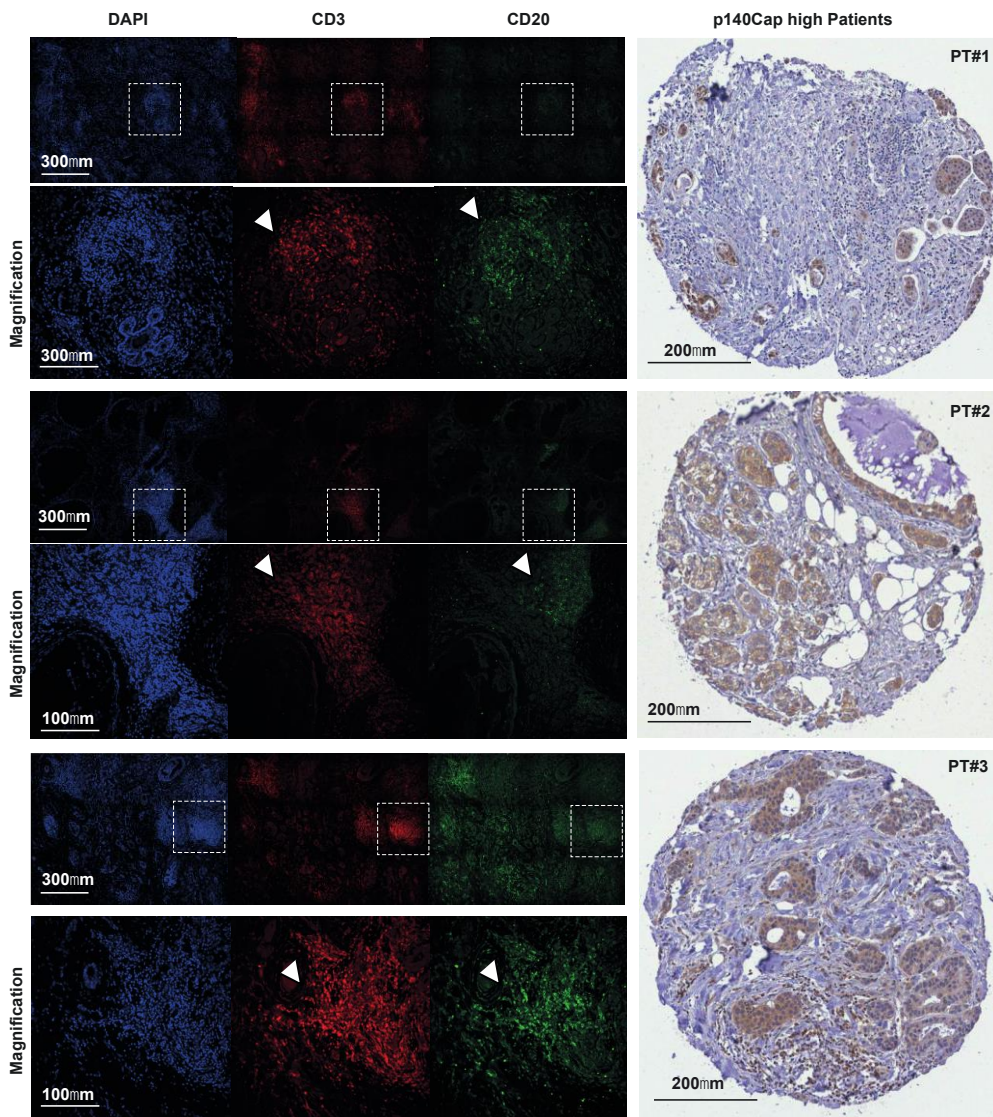

52

53 **Supplementary Fig. 2**

54 Left, Representative immunofluorescence images from the immunophenotypic characterization of  
 55 the TIL infiltrate in n=3 different p140Cap<sup>HIGH</sup> breast tumors performed on 3µm-thick FFPE sections  
 56 using an anti-CD3 (red) and anti-CD20 (green) antibody to recognize T- and B-lymphocytes,  
 57 respectively. For each tumor sample (n=3), a tile merge (top panels) of 12 representative regions of  
 58 interest (ROI) acquired independently is shown for each staining (blu, DAPI; red, CD3; green, CD20).  
 59 A representative ROI from the tile merge for each staining is magnified in bottom panels. Right,  
 60 Representative immunohistochemistry images of the TMA cores of the three different p140Cap<sup>HIGH</sup>  
 61 breast tumors (PT#1-3). Scale bars are indicated.

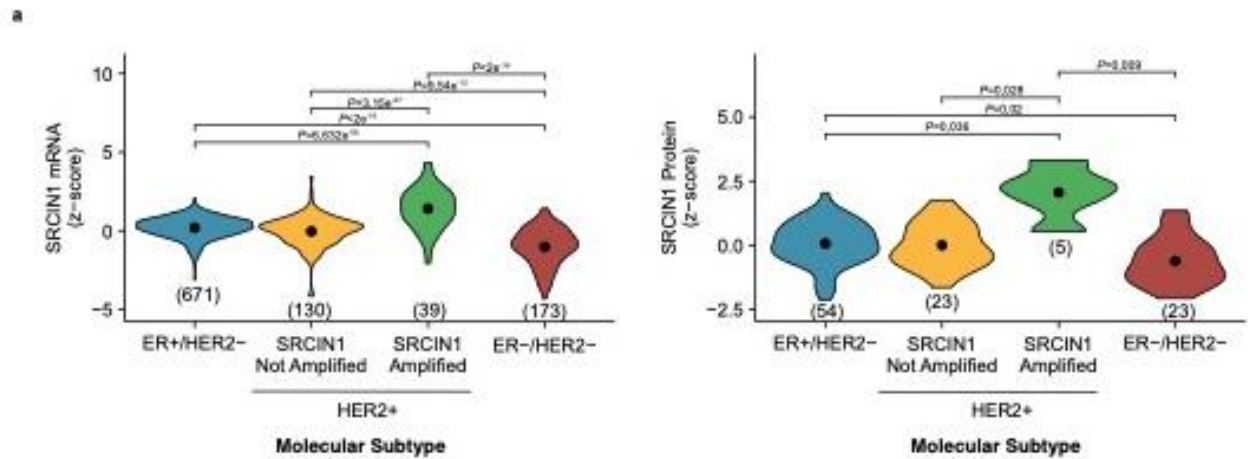

**b** Correlation with p140Cap and molecular subtypes

|           | p140Cap High | p140Cap Low | Total | OR (CI)          | p      |
|-----------|--------------|-------------|-------|------------------|--------|
| ER+/HER2- | 325 (80.7%)  | 78 (19.3%)  | 403   | Reference        |        |
| HER2+     | 45 (67.2%)   | 22 (32.8%)  | 67    | 2.04 (1.16-3.59) | 0.012  |
| ER-/HER2- | 16 (57.1%)   | 12 (42.9%)  | 28    | 3.13 (1.42-6.87) | 0.0031 |
| Total     | 386          | 112         | 498   |                  |        |

62

63

64

65 **Supplementary Fig. 3**

66 **a** Analysis of p140Cap expression across the different molecular subtypes of human BC. Violin plots  
 67 show the expression levels of *SRCIN1* transcripts (left) and p140Cap protein (right) in different  
 68 molecular subtypes of human BC patients from the 1095 BC female patients from TCGA-BRCA  
 69 cohort<sup>34</sup>. The black dots indicate the average. The number of patients for each subtype is shown in  
 70 parentheses. For the HER2+ subtype, tumors with presence or absence of *SRCIN1* co-amplification  
 71 are shown.

72 **b** Analysis of the distribution of p140Cap<sup>HIGH</sup> and p140Cap<sup>LOW</sup> female patients of the 498 BC female  
 73 patients of the IEO cohort, see Methods, according to the different molecular subtypes: luminal  
 74 (ER+/HER2-), HER2-amplified (HER2+) and triple-negative (ER-/HER2-); Odds Ratio (OR) with  
 75 95% Confidence Intervals (CI) are indicated; p-value, Pearson's Chi-Squared Test.

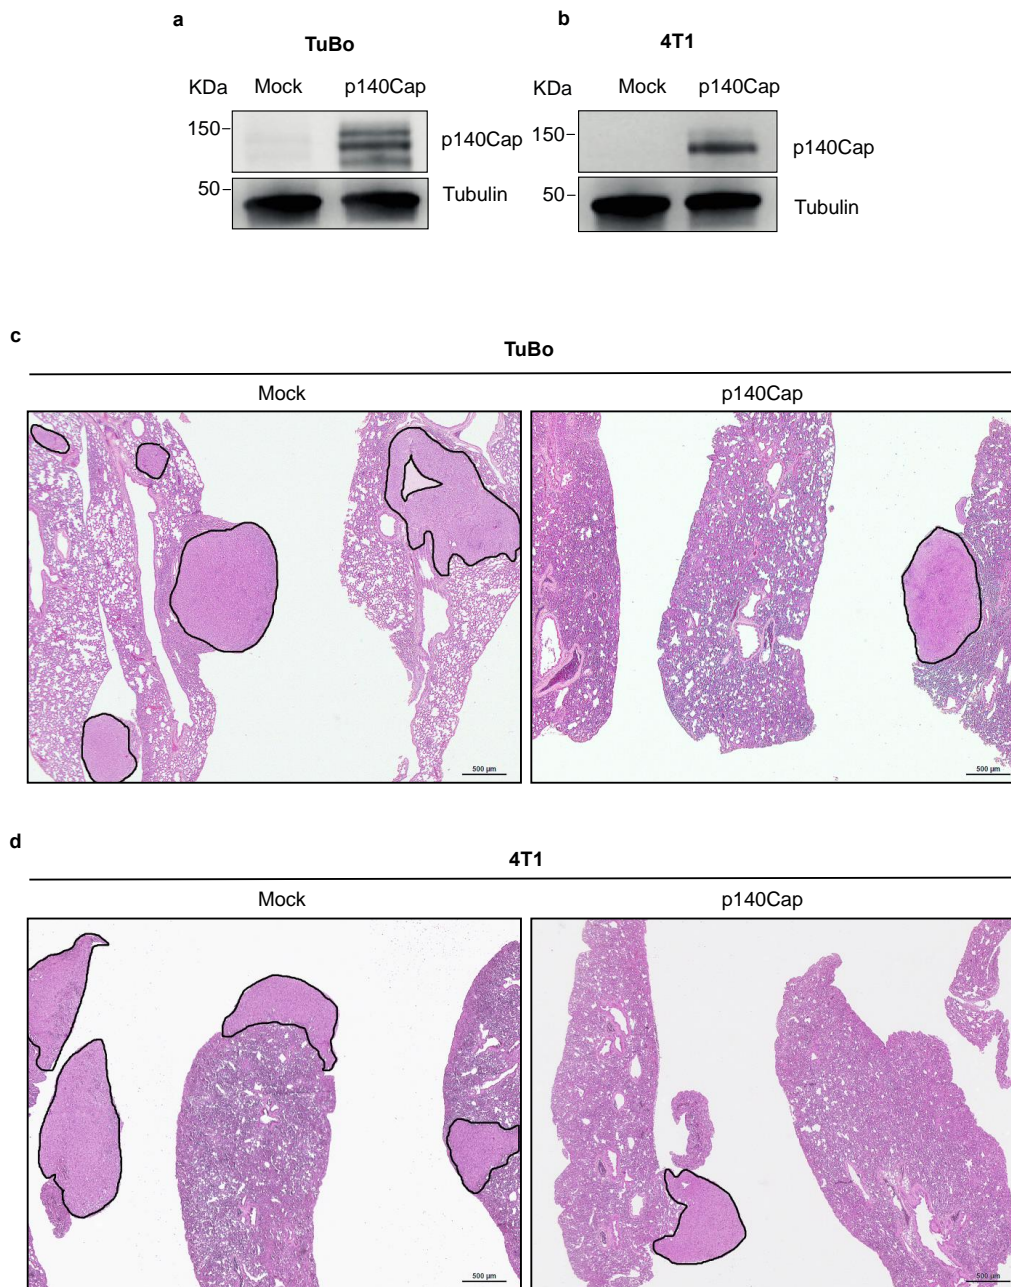

77

78 **Supplementary Fig. 4**

79 **a-b** Western Blot analysis of a pool of four clones with enforced p140Cap expression upon retroviral  
 80 infection in TuBo in **a**, and 4T1 cells in **b** (n=10 experimental repeats). Tubulin was used as loading  
 81 control.

82 **c-d** A set of representative H&E images of lung tissues from mice injected with mock or p140Cap  
83 TuBo, or 4T1 cells, where each figure shows the metastatic area (see also Methods); TuBo, n=5 mice;  
84 4T1, n= 10 mice.

85 .

86

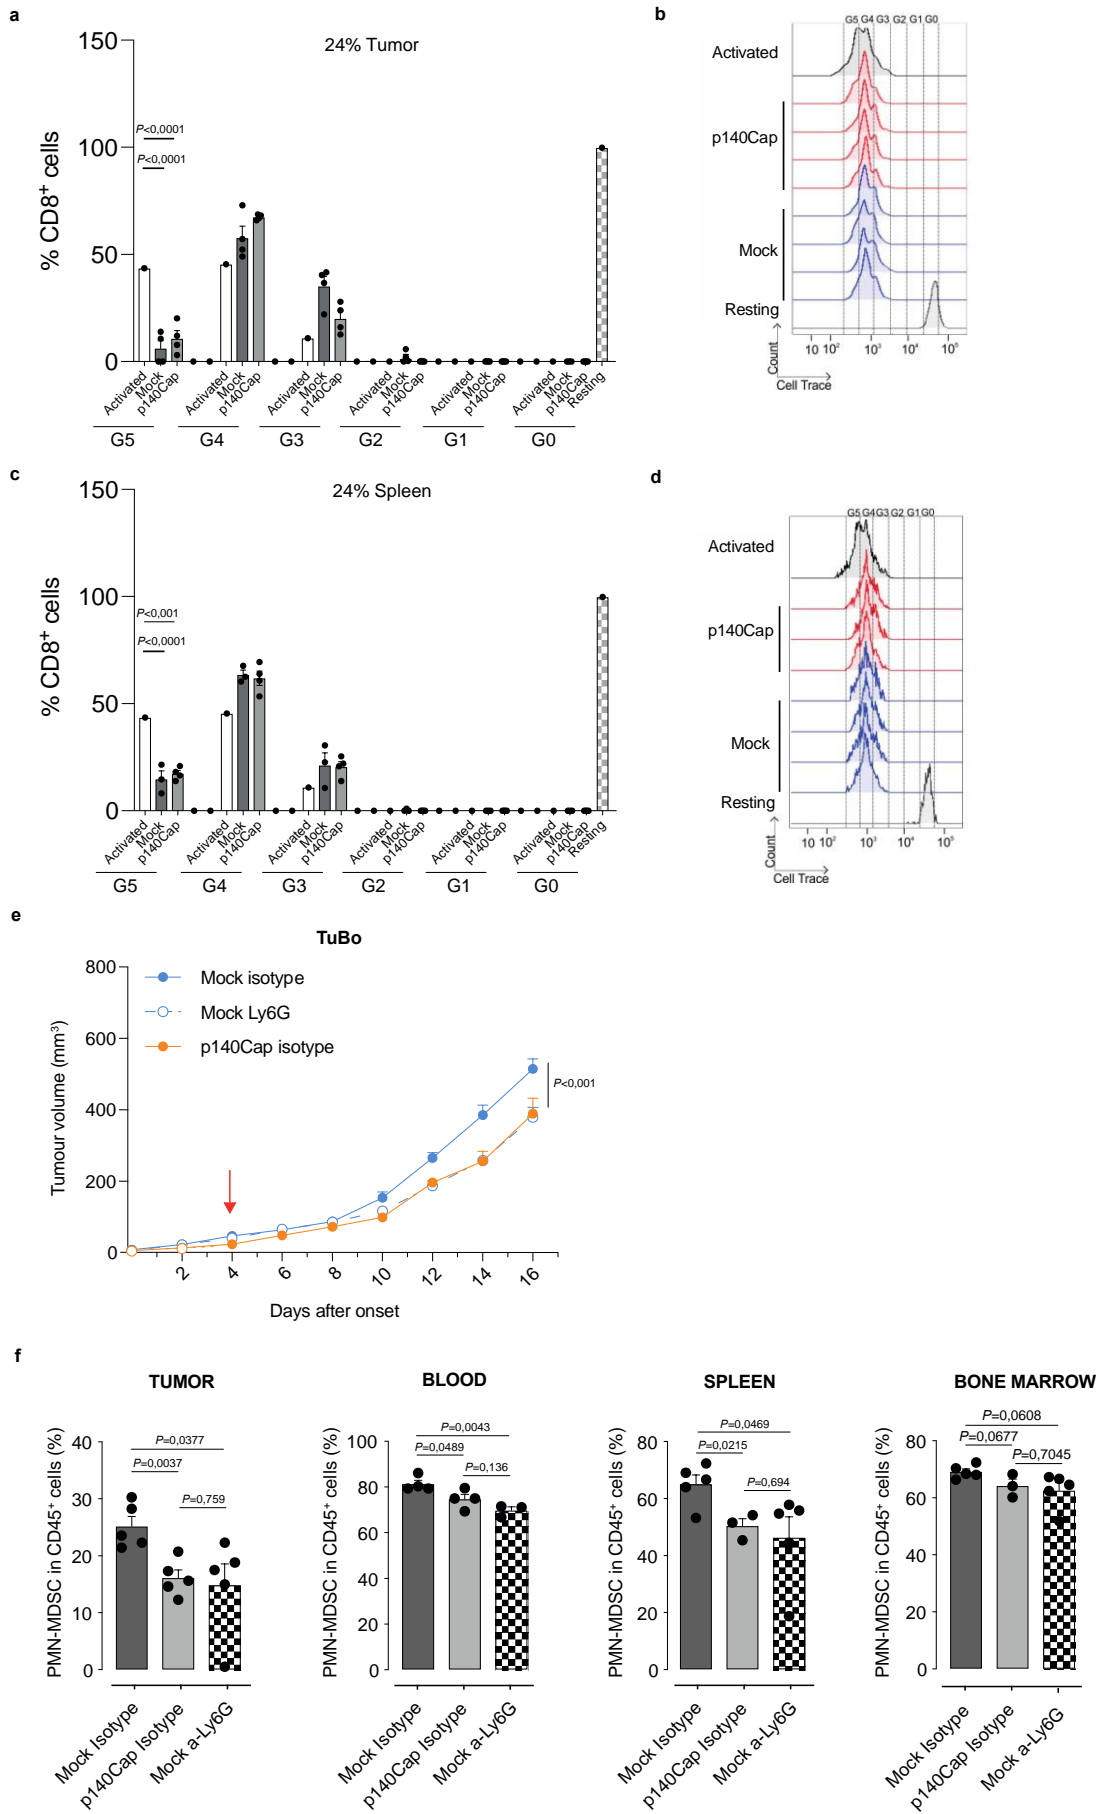



88 **Supplementary Fig. 5**

89 Suppressive activity of tumor-infiltrating CD11b<sup>+</sup> cells isolated from either p140Cap (red) or Mock  
90 (blue) tumor-bearing mice co-cultured with activated T cells in presence, was evaluated by flow  
91 cytometry tracking cell trace dilution in Cell Trace-labelled; peptide activated HA-specific T cells  
92 after 3 days.

93 **a** Cell Trace dilution representative plots of CTLs co-cultured with 24% of tumor-isolated CD11b<sup>+</sup>  
94 cells are shown. Data are represented for n=4 mice/group as mean  $\pm$  SEM; two-tailed unpaired *t* test.

95 **b** T cell proliferative generations (from G0 to G5) under resting condition (not activated by peptide,  
96 grey line) or stimulated and co-cultured with CD11b<sup>+</sup> cells derived from Mock-derived (blues) or  
97 p14Cap (red) tumors. Data are represented for n=4 mice/group as mean  $\pm$  SEM; 2way ANOVA test.

98 G: generations. Suppressive activity of splenic Ly6G<sup>+</sup> cells isolated from either p140Cap (red) or  
99 Mock (blue) tumor-bearing mice co-cultured with activated T cells in presence was evaluated by flow  
100 cytometry tracking cell trace dilution in Cell Trace-labelled; peptide activated HA-specific T cells  
101 after 3 days.

102 **c** Cell trace dilution representative plots of CTLs co-cultured with 24% of splenic Ly6G<sup>+</sup> cells. (D)  
103 T cell proliferative generations (from G0 to G5) under resting condition (not activated by peptide,  
104 grey line) or stimulated and co-cultured with Ly6G<sup>+</sup> cells derived from Mock-derived (blues) or  
105 p140Cap (red) tumors. Data are represented for n=4 mice/group as mean  $\pm$  SEM; 2way ANOVA test.

106 **e-f** In vivo anti-Ly6G treatment.

107 **e** 10<sup>5</sup> TuBo Mock and p140Cap cells were injected into the mammary fat pad of female BALB/c  
108 mice. When tumors size reached 80 mm<sup>3</sup>, anti-Ly6G antibody treatment was performed by two IP  
109 injections per week, of 100  $\mu$ g of anti-Ly6G (n=5) or control IgG2a isotype antibodies (n=5/Mock  
110 isotype; n=4/p140Cap isotype). Tumor growth was monitored and tumor size was measured. Data  
111 are represented for n=5 mice/group as mean  $\pm$  SEM; 2way ANOVA test.

112 **f** Flow cytometry analysis for PMN-MDSCs. Representative flow cytometry bar plots showed the  
113 percentage (%) of PMN-MDSC (CD45+CD11b+Ly6G+Ly6Clow) cells normalised on CD45+ cells,  
114 in tumor (n=5), blood (n=4/Mock isotype; n=4/p140Cap isotype; n=3/Mock anti-Ly6G), spleen  
115 (n=5/Mock isotype; n=3/p140Cap isotype; n=5/Mock anti-Ly6G) and bone marrow (n=5/Mock  
116 isotype; n=3/p140Cap isotype; n=5/Mock anti-Ly6G) of mice treated as in (E) with anti-Ly6G and  
117 anti-isotype administrations. Data are represented for n=x mice/group as mean  $\pm$  SEM; two-tailed  
118 unpaired t test.

119

120

121

122

123

124

125

126

127

128

129

130

131

132

133

134

135

136

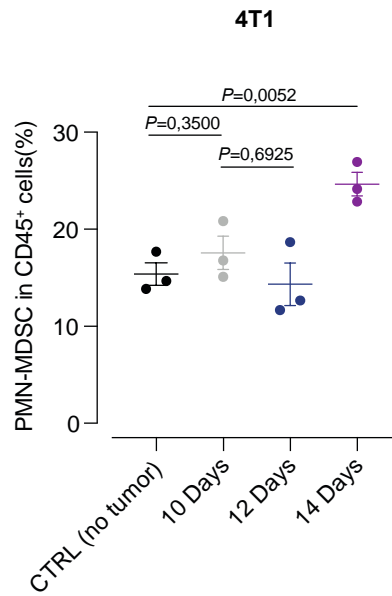

137

138

139 **Supplementary Fig. 6**

140 FACS analysis of PMN-MDSCs (CD45+CD11b+Ly6G+Ly6Clow) cells normalised on CD45+ cells  
141 in lungs of Mock 4T1 tumor-bearing mice after 10, 12 and 14 days post-injection. Data are  
142 represented for n=3 mice/group; dot plot represented as mean  $\pm$  SEM; two-tailed unpaired t test.

143

144

145

146

147

148

149

150

151

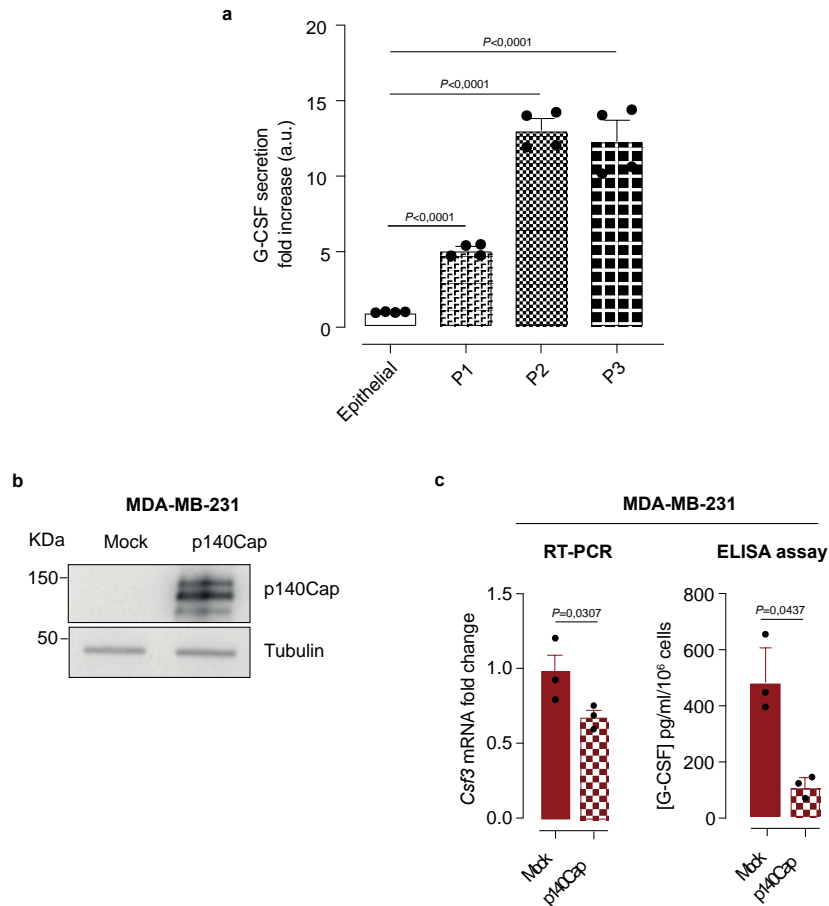

152

153

### 154 **Supplementary Fig. 7**

155 **a** ELISA assay of G-CSF secretion in Mock TUBO cell culture supernatants and in P1, P2 and P3  
156 mammosphere supernatants. Data are represented for n=4 experimental repeats; bar plot represented  
157 G-CSF fold increase as mean  $\pm$  SEM; two-tailed unpaired t test.

158 **b** Generation of MDA-MB-231 p140Cap overexpressing cells. Western Blot analysis of a pool of  
159 four clones of MDA-MB-231 cells expressing p140Cap upon retroviral infection. Data are  
160 represented for n=10 experimental repeats. Tubulin was used as loading control.

161 c G-CSF transcript and G-CSF protein levels were measured in Mock and p140Cap MDA-MB-231  
162 cells, by quantitative RT-PCR or by ELISA on cell culture supernatants, respectively. Data are  
163 represented for n=3 experimental repeats, bar plot represented as mean  $\pm$  SEM; two-tailed unpaired t  
164 test.

165

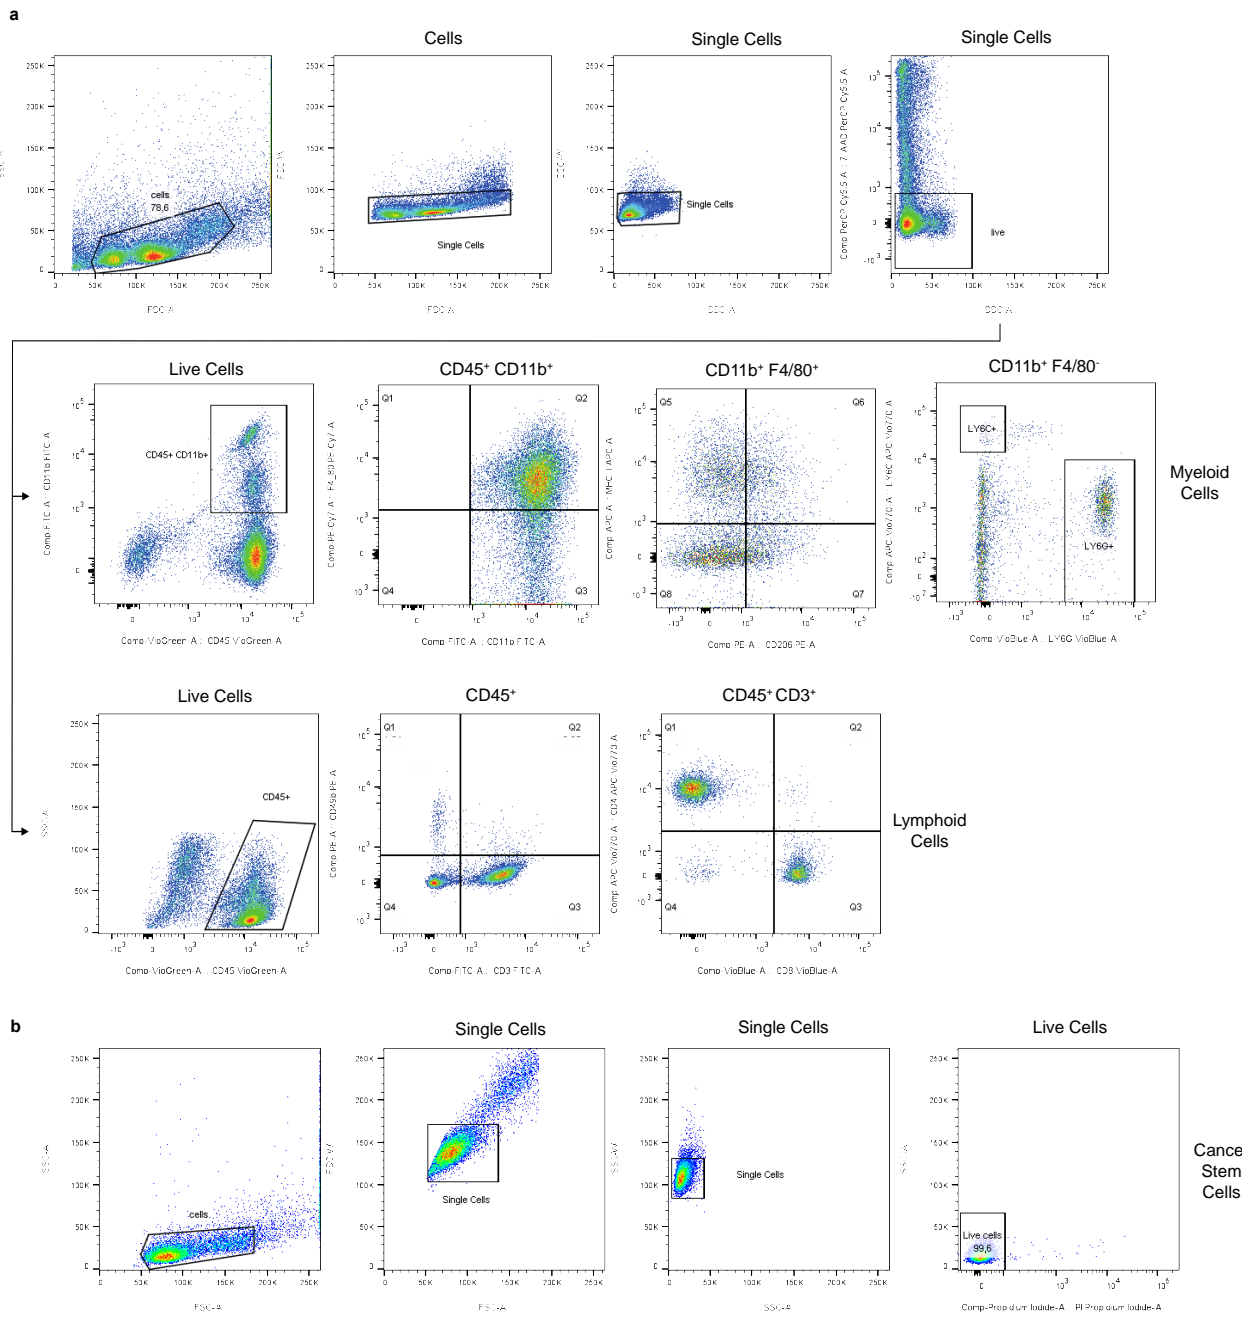

167

168

169 **Supplementary Fig. 8**

170 **a** Gating strategy for the tumor immune infiltrate in Figure 2 (panel **b-d**), Figure 4 (panel **a-b**), Figure  
 171 6 (panel **j**), Figure 9 (panel **f**)

172 **b** Gating strategy for the Cancer Stem Cell markers in Figure 5 (panel **d-e**).
